# Supplementary material for: The Role of HOX Genes as Potential Biomarkers in Colorectal Cancer: A Systematic Review
Source: Research Square preprint supplement (doi:10.21203/rs.3.rs-618476/v1), 2021-06-16
Supplement: Supplementary file 1 [file d6ff7a6b068998b9844223f8.xlsx]

## Sheet: Sheet1
Supplementary Material, Table S1: Quality Assessement of Clinical Studies
SYRCLE'S (Systematic Review Centre for Laboratory animal experimentaion RoB (Risk of Bias) tool 2014	Liu et al	Ying et al	Zhang et al	Yuan et al	Ji et al	Sun et al	Hoshino et al	Zhan et al	Huang et al	Liao et al	Ghoshal et al
1. Was the allocation sequence adequately generated and applied? Did the investigators describe a random component in the sequence generation process such as: Referring to a random number table; Using a computer random number generator	NR	NR	NR	NR	NR	NR	NR	NR	NR	NR	NR
2. Were the groups similar at baseline or were they adjusted for confounders in the analysis?
2.1 Was the distribution of relevant baseline characteristics balanced for the intervention and control groups?	Yes	Yes	Yes	Yes	Yes	Yes	Yes	Yes	Yes	Yes	Yes
2.2 If relevant, did the investigators adequately adjust for unequal distribution of some relevant baseline characteristics in the analysis?	NA	NA	NA	NA	NA	NA	NA	NA	NA	NA	NA
2.3 Was the timing of disease induction adequate?	Yes	Yes	Yes	Yes	Yes	Yes	Yes	Yes	Yes	Yes	Yes
3. Was the allocation to the different groups adequately concealed during? Could the investigator allocating the animals to intervention or control group not foresee assignment due to one of the following or equivalent methods? Third-party coding of experimental and control group allocation Central randomization by a third party Sequentially numbered opaque, sealed envelopes	NR	NR	NR	NR	NR	NR	NR	NR	NR	NR	NR
4. Were the animals randomly housed during the experiment?	NR	NR	NR	NR	NR	NR	NR	NR	NR	NR	NR
4.1 Did the authors randomly place the cages or animals within the animal room/facility? Animals were selected at random during outcome assessment.	NR	NR	NR	NR	NR	NR	NR	NR	NR	NR	NR
4.2 Is it unlikely that the outcome or the outcome measurement was influenced by not randomly housing the animals?	Yes	Yes	Yes	Yes	Yes	Yes	Yes	Yes	Yes	Yes	Yes
5. Were the caregivers and/or investigators blinded from knowledge which intervention each animal received during the experiment? Was blinding of caregivers and investigators ensured, and was it unlikely that their blinding could have been broken? ID cards of individual animals, or cage/animal labels are coded and identical in appearance; Sequentially numbered drug containers are identical in app…	NR	NR	NR	NR	NR	NR	NR	NR	NR	NR	NR
6. Were animals selected at random for outcome assessment? Did the investigators randomly pick an animal during outcome assessment, or did they use a random component in the sequence generation for outcome assessment? Referring to a random number table; Using a computer random number generator; Etc.	NR	NR	NR	NR	NR	NR	NR	NR	NR	NR	NR
7. Was the outcome assessor blinded?	NR	NR	NR	NR	NR	NR	NR	NR	NR	NR	NR
7.1 Was blinding of the outcome assessor ensured, and was it unlikely that blinding could have been broken? Outcome assessment methods were the same in both groups; Animals were selected at random during outcome assessment	NR	NR	NR	NR	NR	NR	NR	NR	NR	NR	NR
7.2 Was the outcome assessor not blinded, but do review authors judge that the outcome is not likely to be influenced by lack of blinding? (e.g., mortality)	NR	NR	NR	NR	NR	NR	NR	NR	NR	NR	NR
8. Were incomplete outcome data adequately addressed?	NR	NR	NR	NR	NR	NR	NR	NR	NR	NR	NR
8.1 Were all animals included in the analysis?	NR	NR	NR	NR	NR	NR	NR	NR	NR	NR	NR
8.2 Were the reasons for missing outcome data unlikely to be related to true outcome? (e.g., technical failure)	NR	NR	NR	NR	NR	NR	NR	NR	NR	NR	NR
8.3 Are missing outcome data balanced in numbers across intervention groups, with similar reasons for missing data across groups?	NR	NR	NR	NR	NR	NR	NR	NR	NR	NR	NR
8.3 Are missing outcome data imputed using appropriate methods?	NR	NR	NR	NR	NR	NR	NR	NR	NR	NR	NR
9. Are reports of the study free of selective outcome reporting?	NR	NR	NR	NR	NR	NR	NR	NR	NR	NR	NR
9.1 Was the study protocol available and were all of the study’s pre-specified primary and secondary outcomes reported in the current manuscript?	NR	NR	NR	NR	NR	NR	NR	NR	NR	NR	NR
9.2 Was the study protocol not available, but was it clear that the published report included all expected outcomes	Yes	Yes	Yes	Yes	Yes	Yes	Yes	Yes	Yes	Yes	Yes
10. Was the study apparently free of other problems that could result in high risk of bias?	NR	NR	NR	NR	NR	NR	NR	NR	NR	NR	NR
10.1 Was the study free of contamination (pooling drugs)?	NR	NR	NR	NR	NR	NR	NR	NR	NR	NR	NR
10.2 Was the study free of inappropriate influence of funders?	NR	NR	NR	NR	NR	NR	NR	NR	NR	NR	NR
10.3 Was the study free of unit analysis error?	NR	NR	NR	NR	NR	NR	NR	NR	NR	NR	NR
10.4 Were design-specific risks of bias absent?	NR	NR	NR	NR	NR	NR	NR	NR	NR	NR	NR
10.5 Were new animals added to the control and experimental groups to replace drop-outs from the original population?	NR	NR	NR	NR	NR	NR	NR	NR	NR	NR	NR
11. Additional questions from CAMARADES tool 2004
11.1 Compliance with animal welfare regulations	Yes	Yes	Yes	Yes	Yes	Yes	Yes	NR	Yes	Yes	Yes
11.2 Sample size	NR	Yes	Yes	Yes	Yes	Yes	Yes	Yes	Yes	Yes	NR
11.3 Sample size calculation	NR	NR	NR	NR	NR	NR	NR	NR	NR	NR	NR
Yes/No/Not Reported (NR)
